# Supplementary material
Source: PubMed Central journal article supplement (PMC8187263)
Supplement: NIHMS1663343-supplement-1.pdf [file NIHMS1663343-supplement-1.pdf]

## Appendix A

Figure A1. Odds ratios and 95% confidence intervals for the association between poor oral health and dietary intake in older people in the BRHS.

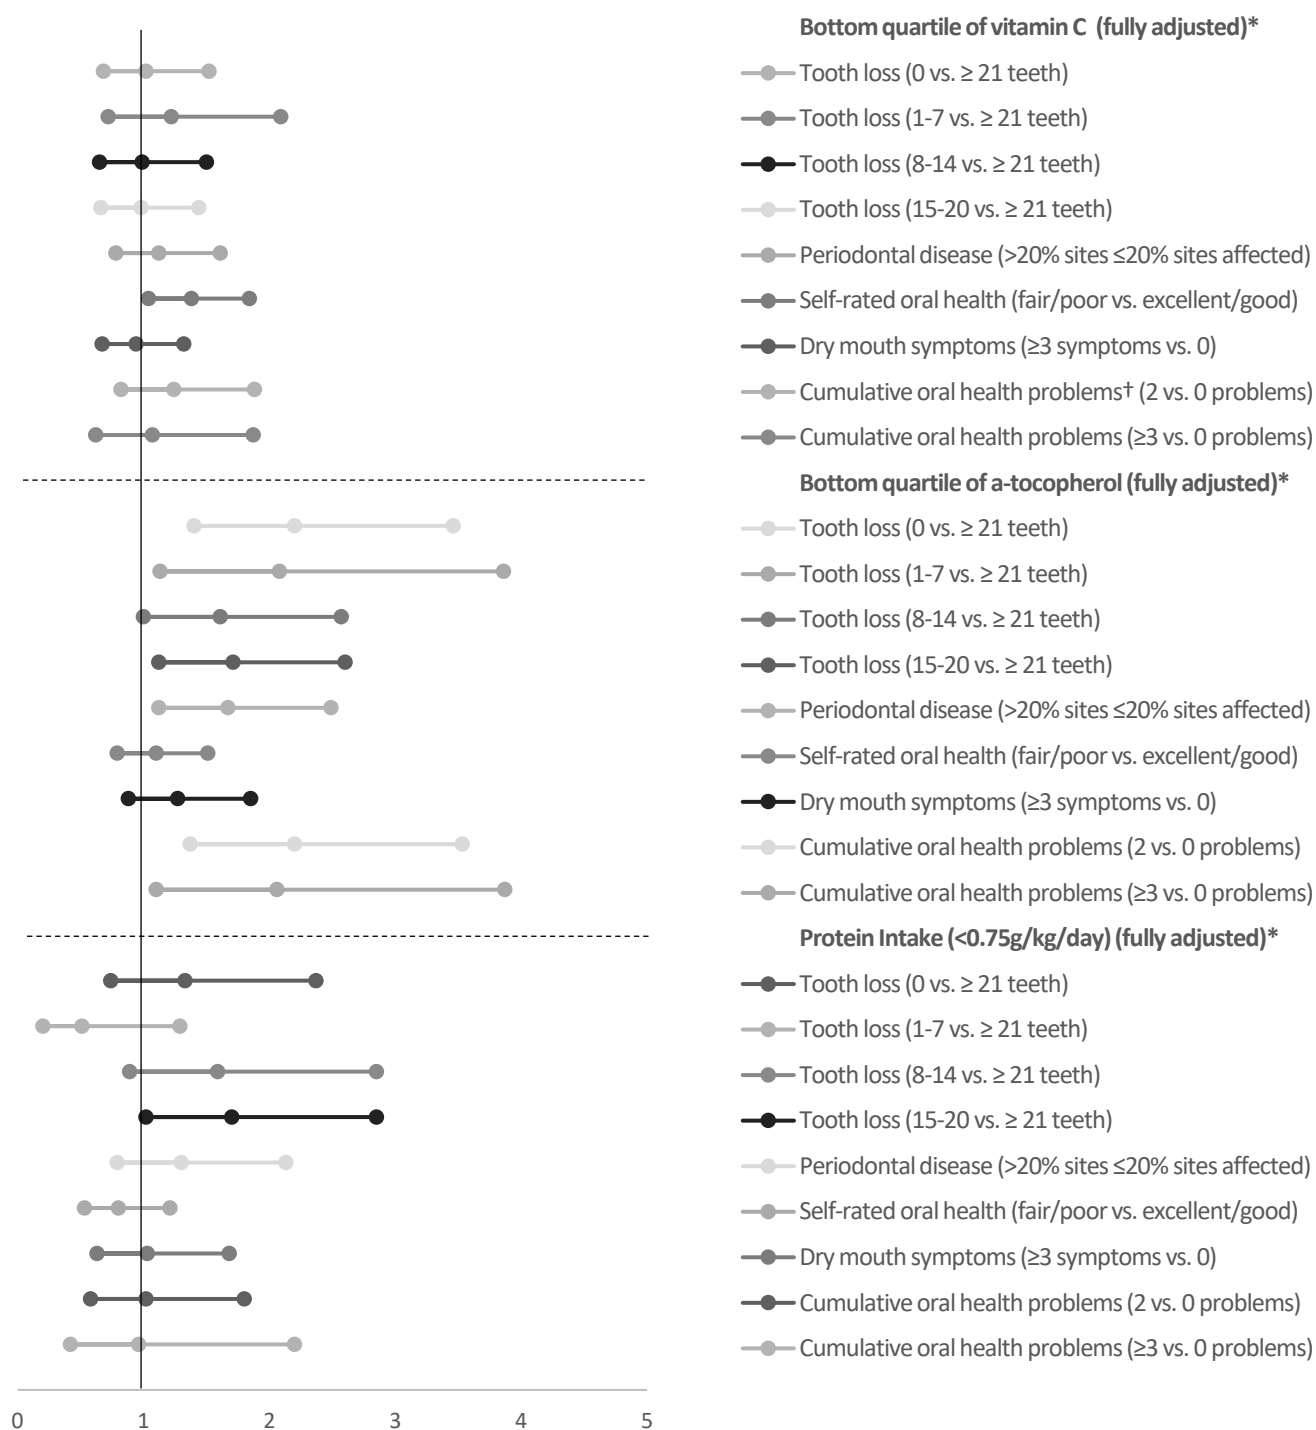

\* age, social class, smoking, alcohol, history of cvd and diabetes, BMI, caloric intake

† <21 teeth, difficulty eating, symptoms of dry mouth, and sensitivity to hot, cold or sweet
