# Supplementary material
Source: PubMed Central journal article supplement (PMC8187263)
Supplement: NIHMS1663343-supplement-2.pdf [file NIHMS1663343-supplement-2.pdf]

## Appendix C

Figure C1. Odds ratios and 95% confidence intervals for the association between poor oral health and dietary intake in older people in the HABC Study.

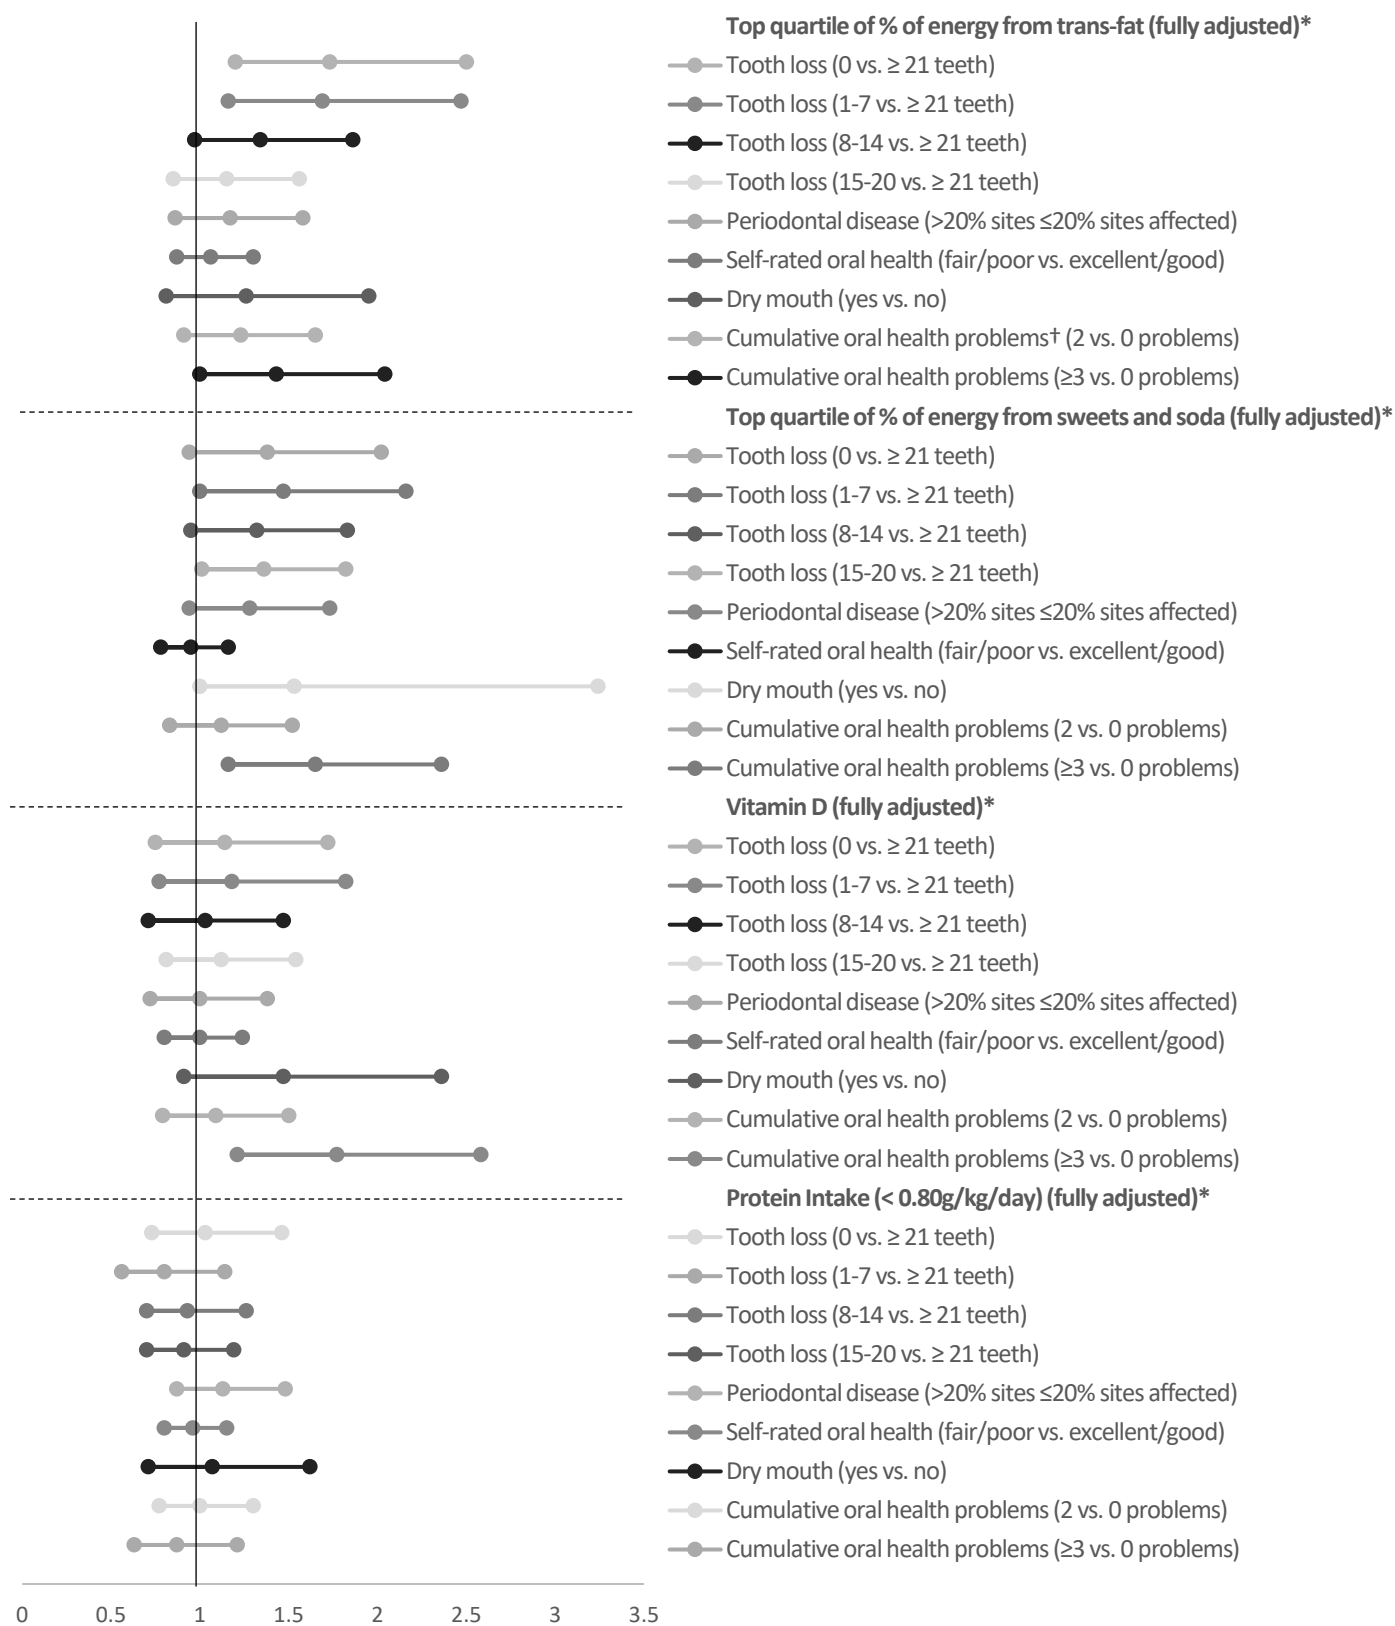

\* age, sex, race, education, smoking, alcohol, history of cvd and diabetes, BMI; vitamin D and protein intake analyses adjusted further for caloric intake

<sup>†</sup>dry mouth when eating, <21 remaining teeth, any difficulty eating or chewing, limit of food due to gum problems
