# Supplementary material
Source: PubMed Central journal article supplement (PMC8187263)
Supplement: NIHMS1663343-supplement-3.pdf [file NIHMS1663343-supplement-3.pdf]

Appendix B

Figure B1. Odds ratios and 95% confidence intervals for the association between oral health and processed meat intake in older people in the BRHS and HABC Study.

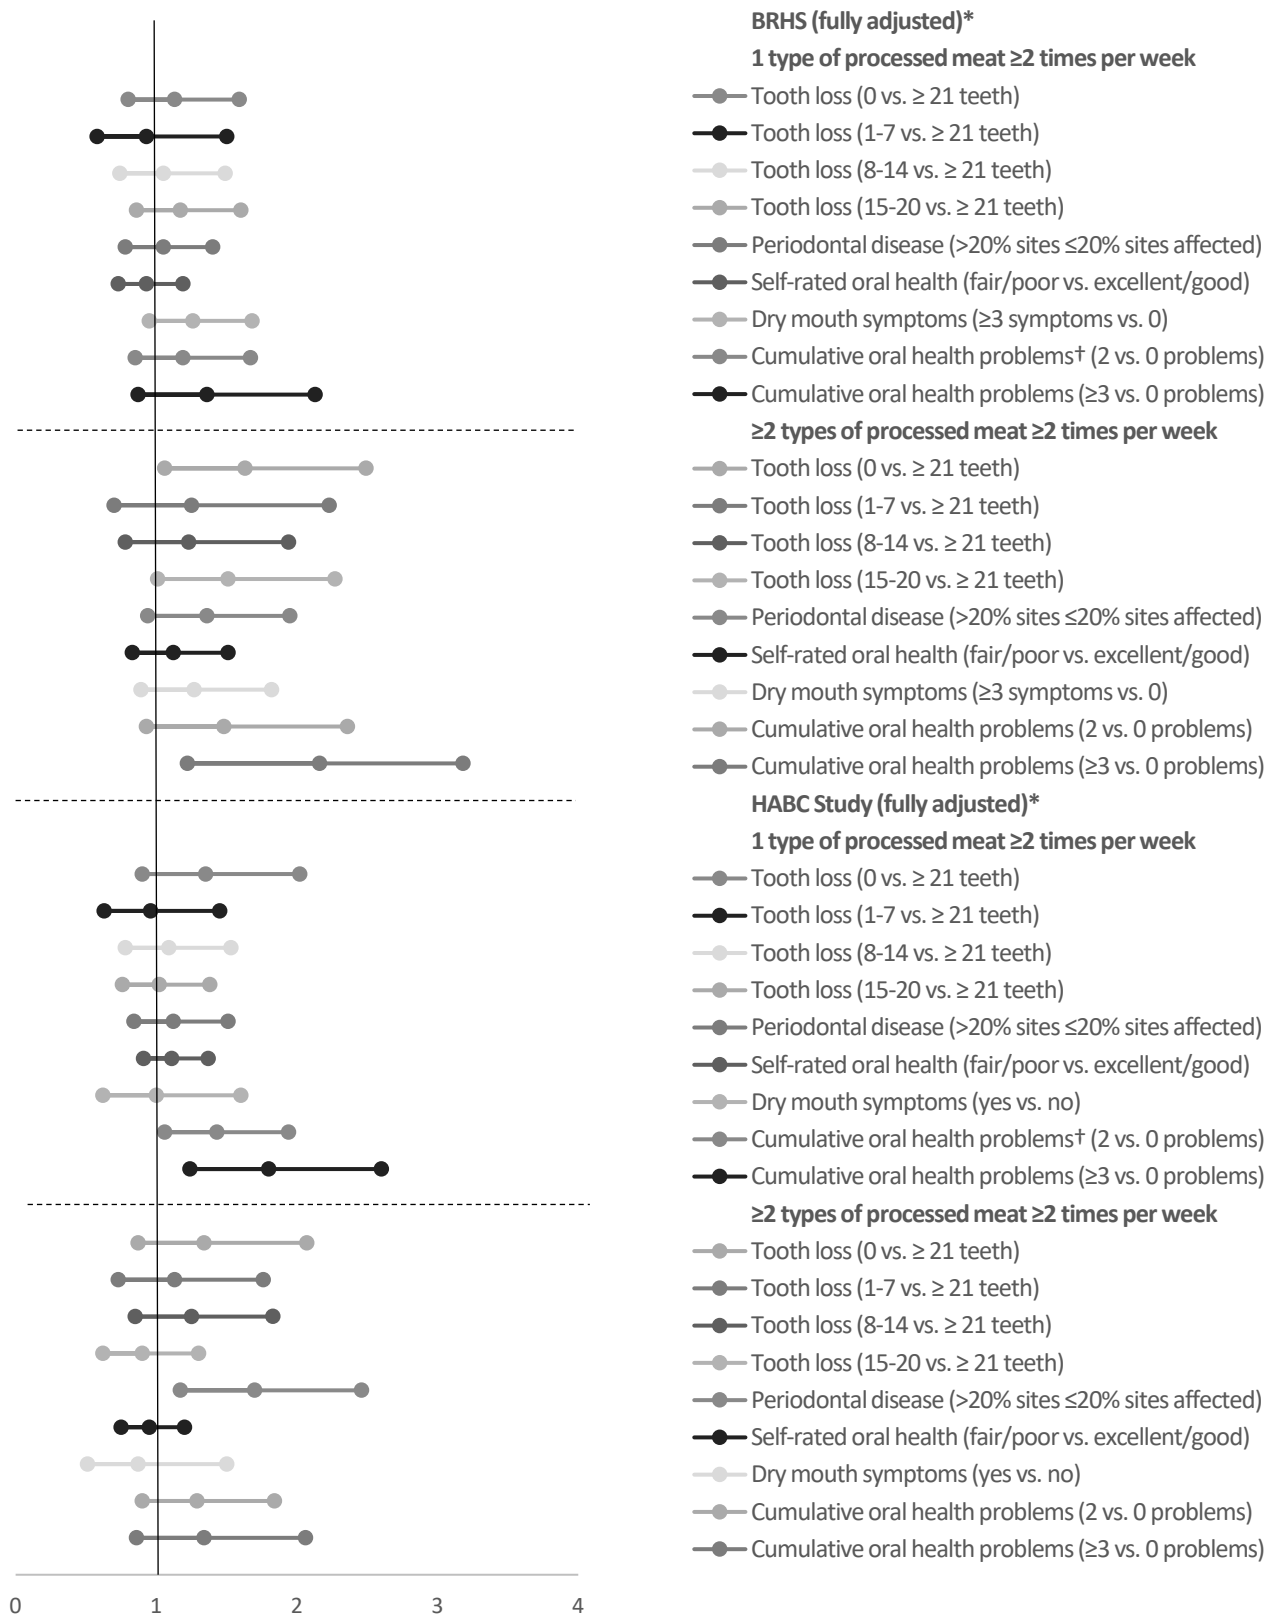

\*BRHS: age, social class, smoking, alcohol, history of CVD and diabetes, and BMI; HABC Study: age, sex, race, education, smoking, alcohol, history of CVD and diabetes, and BMI

<sup>†</sup>BRHS:  $\geq 3$  dry mouth symptoms, <21 remaining teeth, any difficulty eating, sensitivity to hot, cold or sweets

HABC Study: dry mouth symptoms, <21 remaining teeth, any difficulty eating, limit of food due to gum problems
